# Supplementary material
Source: PubMed Central journal article supplement (PMC4169063)
Supplement: 12263_2014_412_MOESM1_ESM.pdf [file 12263_2014_412_MOESM1_ESM.pdf]

Article title: Genetic predisposition scores for dyslipidaemia influence plasma lipid concentrations at baseline, but not the changes after controlled intake of n-3 polyunsaturated fatty acids

Journal name: Genes and Nutrition

Author names: Aseel AlSaleh, Zoitsa Maniou, Fiona J Lewis, Wendy L Hall, Thomas A B Sanders and Sandra D O'Dell.

Affiliation and e-mail address of the corresponding author: Dr Sandra O'Dell, King's College London, School of Medicine, Diabetes and Nutritional Sciences Division.

E-mail: sandra.o'dell@kcl.ac.uk.

### Online Resource 1 SNP associations with plasma lipids in previous GWAS studies

#### Genome-wide significant associations for TC

| GWAS SNP <sup>a</sup> | Chromosome | Position <sup>b</sup> | Gene(s) <sup>c</sup>     | Alleles (maj/min) | Risk allele <sup>d</sup> | Risk allele freq. | Sample n <sup>e</sup> | Beta (SE) risk-allele <sup>f,g,h</sup> | P-value* | Reference                               |
|-----------------------|------------|-----------------------|--------------------------|-------------------|--------------------------|-------------------|-----------------------|----------------------------------------|----------|-----------------------------------------|
| rs3764261             | 16q.13     | 56993324              | <i>CETP</i>              | G,T               | T                        | 0.32              | 94472                 | 1.67 (0.23) mg/dL                      | 6.67E-14 | Teslovich TM et al. (2010) <sup>f</sup> |
| rs1532085             | 15q21.3    | 58683366              | <i>LIPC</i>              | G,A               | A                        | 0.39              | 98656                 | 1.54 (0.20) mg/dL                      | 8.83E-20 | Teslovich TM et al. (2010) <sup>f</sup> |
| rs1367117             | 2p24.1     | 21263900              | <i>APOB</i>              | G,A               | A                        | 0.30              | 100176                | 4.16 (0.22) mg/dL                      | 4.08E-96 | Teslovich TM et al. (2010) <sup>f</sup> |
| rs4299376             | 2p21       | 44072576              | <i>ABCG5,ABCG8</i>       | T,G               | G                        | 0.30              | 95992                 | 3.01 (0.22) mg/dL                      | 4.03E-45 | Teslovich TM et al. (2010) <sup>f</sup> |
| rs6882076             | 5q33.3     | 156390297             | <i>TIMD4,HAVCR1</i>      | C,T               | C                        | 0.65              | 100184                | 1.98 (0.20) mg/dL                      | 7.46E-28 | Teslovich TM et al. (2010) <sup>f</sup> |
| rs1260326             | 2p23.3     | 27730940              | <i>GCKR</i>              | C,T               | T                        | 0.41              | 100176                | 1.91 (0.19) mg/dL                      | 7.31E-27 | Teslovich TM et al. (2010) <sup>f</sup> |
| rs2954022             | 8q24.13    | 126482621             | <i>TRIB1</i>             | C,A               | C                        | 0.54              | 100184                | 2.30 (0.19) mg/dL                      | 5.02E-36 | Teslovich TM et al. (2010) <sup>f</sup> |
| rs3850634             | 1p31.3     | 63050598              | <i>ANGPTL3,DOCK7</i>     | T,G               | T                        | 0.68              | 97148                 | 2.60 (0.20) mg/dL                      | 4.9E-41  | Teslovich TM et al. (2010) <sup>f</sup> |
| rs1167998             | 1p31.3     | 62931632              | <i>ANGPTL3,DOCK7</i>     | A,C               | A                        | 0.67              | 17346                 | 0.073 (0.012) SD                       | 6.39E-10 | Aulchenko et al. (2009)                 |
| rs174550              | 11q12.2    | 61571478              | <i>FADS1,FADS2,FADS3</i> | T,C               | T                        | 0.66              | 100184                | 1.78 (0.20) mg/dL                      | 2.08E-22 | Teslovich TM et al. (2010) <sup>f</sup> |

Genome-wide significant associations for HDL-C

| GWAS SNP <sup>a</sup> | Chromosome | Position <sup>b</sup> | Gene(s) <sup>c</sup>     | Alleles (maj/min) | Risk allele <sup>d</sup> | Risk allele freq. | Sample n <sup>e</sup> | Beta (SE) risk-allele <sup>f,g,h</sup> | P-value*  | Reference                               |
|-----------------------|------------|-----------------------|--------------------------|-------------------|--------------------------|-------------------|-----------------------|----------------------------------------|-----------|-----------------------------------------|
| rs3764261             | 16q.13     | 56993324              | <i>CETP</i>              | G,T               | G                        | 0.68              | 94225                 | -3.39 (0.09) mg/dL                     | 7.10E-380 | Teslovich TM et al. (2010) <sup>f</sup> |
| rs3764261             | 16q.13     | 56993324              | <i>CETP</i>              | G,T               | G                        | 0.69              | 16728                 | -3.47 (NR) mg/dL                       | 2.3E-57   | Willer et al. (2008) <sup>g</sup>       |
| rs3764261             | 16q.13     | 56993324              | <i>CETP</i>              | G,T               | G                        | 0.72              | 4527                  | -0.092 (0.008) SD                      | 6.97E-29  | Sabatti et al. (2009) <sup>h</sup>      |
| rs3764261             | 16q.13     | 56993324              | <i>CETP</i>              | G,T               | G                        | 0.68              | 16253                 | -0.245 (0.012) SD                      | 2.59E-89  | Aulchenko et al. (2009)                 |
| rs1532085             | 15q21.3    | 58683366              | <i>LIPC</i>              | G,A               | G                        | 0.61              | 98409                 | -1.45 (0.08) mg/dL                     | 2.92E-96  | Teslovich TM et al. (2010) <sup>f</sup> |
| rs1532085             | 15q21.3    | 58683366              | <i>LIPC</i>              | G,A               | G                        | 0.56              | 4529                  | -0.047 (0.0074) SD                     | 1.77E-10  | Sabatti et al. (2009) <sup>h</sup>      |
| rs1532085             | 15q21.3    | 58683366              | <i>LIPC</i>              | G,A               | G                        | 0.59              | 19736                 | -0.130 (0.010) SD                      | 9.72E-36  | Aulchenko et al. (2009)                 |
| rs4846914             | 1q42.13    | 230295691             | <i>GALNT2</i>            | A,G               | G                        | 0.40              | 99881                 | -0.61 (0.07) mg/dL                     | 3.66E-21  | Teslovich TM et al. (2010) <sup>f</sup> |
| rs4846914             | 1q42.13    | 230295691             | <i>GALNT2</i>            | A,G               | G                        | 0.40              | 21312                 | -0.07 (0.01) SD                        | 2E-13     | Kathiresan et al. (2009) <sup>h</sup>   |
| rs4149268             | 9q31.1     | 107647220             | <i>ABCA1</i>             | C,T               | C                        | 0.64              | 19983                 | -0.82 (NR) mg/dL                       | 1.2E-10   | Willer et al. (2008) <sup>g</sup>       |
| rs10808546            | 8q24.13    | 126495818             | <i>TRIB1</i>             | C,T               | C                        | 0.56              | 99900                 | -0.61 (0.07) mg/dL                     | 6.35E-19  | Teslovich TM et al. (2010) <sup>f</sup> |
| rs174547              | 11q12.2    | 61570783              | <i>FADS1,FADS2,FADS3</i> | T,C               | C                        | 0.36              | 40330                 | -0.09 (0.02) SD                        | 2E-12     | Kathiresan et al. (2009) <sup>h</sup>   |

Genome-wide significant associations for LDL-C

| GWAS SNP <sup>a</sup> | Chromosome | Position <sup>b</sup> | Gene(s) <sup>c</sup> | Alleles (maj/min) | Risk allele <sup>d</sup> | Risk allele freq. | Sample n <sup>e</sup> | Beta (SE) risk-allele <sup>f,g,h</sup> | P-value* | Reference                               |
|-----------------------|------------|-----------------------|----------------------|-------------------|--------------------------|-------------------|-----------------------|----------------------------------------|----------|-----------------------------------------|
| rs247616              | 16q.13     | 56989590              | <i>CETP</i>          | C,T               | C                        | 0.68              | 89838                 | 1.45 (0.20) mg/dL                      | 9.25E-13 | Teslovich TM et al. (2010) <sup>f</sup> |
| rs1367117             | 2p24.1     | 21263900              | <i>APOB</i>          | G,A               | A                        | 0.30              | 95446                 | 4.05 (0.19) mg/dL                      | 4.5E-114 | Teslovich TM et al. (2010) <sup>f</sup> |
| rs4299376             | 2p21       | 44072576              | <i>ABCG5,ABCG8</i>   | T,G               | G                        | 0.30              | 91285                 | 2.75 (0.20) mg/dL                      | 1.73E-47 | Teslovich TM et al. (2010) <sup>f</sup> |

|           |         |           |                          |     |   |      |       |                   |          |                                         |
|-----------|---------|-----------|--------------------------|-----|---|------|-------|-------------------|----------|-----------------------------------------|
| rs6882076 | 5q33.3  | 156390297 | <i>TIMD4,HAVCR1</i>      | C,T | C | 0.65 | 95454 | 1.67 (0.19) mg/dL | 1.89E-22 | Teslovich TM et al. (2010) <sup>f</sup> |
| rs1501908 | 5q33.3  | 156398169 | <i>TIMD4,HAVCR1</i>      | C,G | C | 0.63 | 27280 | 0.07 (0.02) SD    | 1.00E-11 | Kathiresan et al. (2009) <sup>h</sup>   |
| rs2954022 | 8q24.13 | 126482621 | <i>TRIB1</i>             | C,A | C | 0.54 | 95454 | 1.84 (0.17) SD    | 2.59E-29 | Teslovich TM et al. (2010) <sup>f</sup> |
| rs3850634 | 1p31.3  | 63050598  | <i>ANGPTL3,DOCK7</i>     | T,G | T | 0.68 | 92503 | 1.59 (0.19) mg/dL | 2.63E-18 | Teslovich TM et al. (2010) <sup>f</sup> |
| rs174546  | 11q12.2 | 61569830  | <i>FADS1,FADS2,FADS3</i> | C,T | C | 0.56 | 4268  | 0.096 (0.018) SD  | 1.30E-07 | Sabatti et al. (2009) <sup>h</sup>      |
| rs174583  | 11q12.2 | 61609750  | <i>FADS1,FADS2,FADS3</i> | C,T | C | 0.65 | 95443 | 1.71 (0.19) mg/dL | 1.17E-21 | Teslovich TM et al. (2010) <sup>f</sup> |

#### Genome-wide significant associations for TG

| GWAS SNP <sup>a</sup> | Chromosome | Position <sup>b</sup> | Gene(s) <sup>c</sup> | Alleles (maj/min) | Risk allele <sup>d</sup> | Risk allele freq. | Sample n <sup>e</sup> | Beta (SE) risk-allele <sup>f,g,h</sup> | P-value* | Reference                               |
|-----------------------|------------|-----------------------|----------------------|-------------------|--------------------------|-------------------|-----------------------|----------------------------------------|----------|-----------------------------------------|
| rs7205804             | 16q.13     | 57004889              | <i>CETP</i>          | G,A               | G                        | 0.55              | 95070                 | 2.88 (0.38) mg/dL                      | 1.15E-12 | Teslovich TM et al. (2010) <sup>f</sup> |
| rs4846914             | 1q42.13    | 230295691             | <i>GALNT2</i>        | A,G               | G                        | 0.40              | 21312                 | 0.08 (0.01) SD                         | 7.00E-15 | Kathiresan et al. (2008) <sup>h</sup>   |
| rs1321257             | 1q42.13    | 230305312             | <i>GALNT2</i>        | A,G               | G                        | 0.39              | 92418                 | 2.76 (0.38) mg/dL                      | 2.09E-14 | Teslovich TM et al. (2010) <sup>f</sup> |
| rs1553318             | 5q33.3     | 156479323             | <i>TIMD4,HAVCR1</i>  | C,G               | C                        | 0.64              | 96598                 | 2.63 (0.39) mg/dL                      | 3.68E-12 | Teslovich TM et al. (2010) <sup>f</sup> |
| rs1260326             | 2p23.3     | 27730940              | <i>GCKR</i>          | C,T               | T                        | 0.41              | 96590                 | 8.76 (0.40) mg/dL                      | 5.7E-133 | Teslovich TM et al. (2010) <sup>f</sup> |
| rs1260326             | 2p23.3     | 27730940              | <i>GCKR</i>          | C,T               | T                        | 0.45              | 19840                 | 0.12 (0.02) SD                         | 2.00E-31 | Kathiresan et al. (2009) <sup>h</sup>   |
| rs1260326             | 2p23.3     | 27730940              | <i>GCKR</i>          | C,T               | T                        | 0.37              | 12435                 | 0.112 (0.013) SD                       | 5.17E-17 | Aulchenko et al. (2009)                 |
| rs1260326             | 2p23.3     | 27730940              | <i>GCKR</i>          | C,T               | T                        | 0.35              | 4501                  | 0.093 (0.015) SD                       | 3.56E-10 | Sabatti et al. (2009) <sup>h</sup>      |
| rs780094              | 2p23.3     | 27741237              | <i>GCKR</i>          | T,C               | C                        | 0.39              | 18407                 | 8.59 (NR) mg/dL                        | 6.1E-32  | Willer et al. (2008) <sup>g</sup>       |
| rs2954029             | 8q24.13    | 126490972             | <i>TRIB1</i>         | A,T               | A                        | 0.53              | 96598                 | 5.64 (0.39) mg/dL                      | 3.29E-55 | Teslovich TM et al. (2010) <sup>f</sup> |
| rs2131925             | 1p31.3     | 63025942              | <i>ANGPTL3,DOCK7</i> | T,G               | T                        | 0.68              | 96598                 | 4.94 (0.40) mg/dL                      | 8.84E-43 | Teslovich TM et al. (2010) <sup>f</sup> |
| rs1167998             | 1p31.3     | 62931632              | <i>ANGPTL3,DOCK7</i> | A,C               | A                        | 0.68              | 14268                 | 0.091 (0.013) SD                       | 1.95E-12 | Aulchenko et al. (2009)                 |

|          |          |          |                          |     |   |      |       |                   |          |                                         |
|----------|----------|----------|--------------------------|-----|---|------|-------|-------------------|----------|-----------------------------------------|
| rs439401 | 19q13.32 | 63025942 | <i>APOE,APOC1,APOC2</i>  | C,T | C | 0.64 | 65871 | 5.50 (0.44) mg/dL | 1.14E-30 | Teslovich TM et al. (2010) <sup>f</sup> |
| rs439401 | 19q13.32 | 63025942 | <i>APOE,APOC1,APOC2</i>  | C,T | C | 0.68 | 11885 | 0.086 (0.014) SD  | 1.78E-09 | Aulchenko et al. (2009)                 |
| rs174546 | 11q12.2  | 61569830 | <i>FADS1,FADS2,FADS3</i> | C,T | T | 0.34 | 96598 | 3.82 (0.38) mg/dL | 5.41E-24 | Teslovich TM et al. (2010) <sup>f</sup> |
| rs174547 | 11q12.2  | 61570783 | <i>FADS1,FADS2,FADS3</i> | T,C | C | 0.34 | 38846 | 0.06 (0.02) SD    | 2.00E-14 | Kathiresan et al. (2009) <sup>h</sup>   |

<sup>a</sup>SNP shown in previous GWAS to exhibit the strongest association in that gene with the trait.

<sup>b</sup>Positions in base pairs are from Human Genome NCBI Build 37.5.

<sup>c</sup>Biological candidate gene(s) or nearest gene(s) is indicated.

<sup>d</sup>Allele associated with adverse lipid profile: increase in TC, LDL-C and TG or decrease in HDL-C.

<sup>e</sup>*n* is the number of individuals included in the association analysis of the SNP and the trait.

<sup>f</sup>The effect sizes for HDL, LDL, and TC expressed in mg/dL were estimated directly. Effect sizes for TG were estimated as percent changes due to a single copy of the minor allele; effect in mg/dL was determined at mean triglyceride level 137.9 mg/dL.

<sup>g</sup>The effect sizes shown were estimated from stage 2 samples only.

<sup>h</sup>The effect on the untransformed trait for each copy of the minor allele expressed as proportion of 1 SD change.

GWAS genome-wide association study; *HDL-C* high density lipoprotein cholesterol; *LDL-C* low density lipoprotein-cholesterol; *MAF* minor allele frequency; *SE* standard error; *SNP* single nucleotide polymorphism; *TC* total cholesterol; *TG* triglyceride.

\*Significance of the test of association derived from linear regression models. GWAS significance taken as  $P < 5.00E-08$ .

#### References

- Aulchenko YS et al. (2009). Nat Genet 41:47-55.  
 Kathiresan S et al. (2008). Nat Genet 40:189-97.  
 Kathiresan S et al. (2009). Nat Genet 41:56-65.  
 Sabatti C et al. (2009). Nat Genet 41:35-46.  
 Teslovich TM et al. (2010). Nature 466:707-13.  
 Willer CJ et al. (2008). Nat Genet 40:161-9.
