# Supplementary material
Source: PubMed Central journal article supplement (PMC4169063)
Supplement: 12263_2014_412_MOESM2_ESM.pdf [file 12263_2014_412_MOESM2_ESM.pdf]

Article title: Genetic predisposition scores for dyslipidaemia influence plasma lipid concentrations at baseline, but not the changes after controlled intake of n-3 polyunsaturated fatty acids

Journal name: Genes and Nutrition

Author names: Aseel AlSaleh, Zoitsa Maniou, Fiona J Lewis, Wendy L Hall, Thomas A B Sanders and Sandra D O'Dell.

Affiliation and e-mail address of the corresponding author: Dr Sandra O'Dell, King's College London, School of Medicine, Diabetes and Nutritional Sciences Division.

E-mail: sandra.o'dell@kcl.ac.uk.

**Online Resource 2** SNP allele and genotype frequencies in MARINA subjects

| SNP       | Gene(s)                    | Alleles<br>(1/2) | MAF  | Genotype frequency <sup>a</sup> |            |           |     | P*   |
|-----------|----------------------------|------------------|------|---------------------------------|------------|-----------|-----|------|
|           |                            |                  |      | 11                              | 12         | 22        | All |      |
| rs3764261 | <i>CETP</i>                | <i>G/T</i>       | 0.36 | 105 (39.0)                      | 137 (50.9) | 27 (10.1) | 269 | 0.07 |
| rs1532085 | <i>LIPC</i>                | <i>G/A</i>       | 0.43 | 96 (35.0)                       | 119 (43.4) | 59 (21.6) | 274 | 0.06 |
| rs1367117 | <i>APOB</i>                | <i>G/A</i>       | 0.30 | 141 (51.4)                      | 104 (37.9) | 29 (10.6) | 274 | 0.14 |
| rs4299376 | <i>ABCG5,ABCG8</i>         | <i>T/G</i>       | 0.32 | 131 (45.8)                      | 125 (43.7) | 30 (10.5) | 286 | 0.98 |
| rs6882076 | <i>TIMD4,HAVCR1</i>        | <i>C/T</i>       | 0.36 | 125 (43.7)                      | 118 (41.3) | 43 (15.0) | 286 | 0.09 |
| rs1260326 | <i>GCKR</i>                | <i>C/T</i>       | 0.39 | 101 (35.9)                      | 141 (50.2) | 39 (13.9) | 281 | 0.36 |
| rs2954029 | <i>TRIB1</i>               | <i>A/T</i>       | 0.47 | 76 (27.8)                       | 135 (49.5) | 62 (22.7) | 273 | 0.89 |
| rs2131925 | <i>ANGPTL3,DOCK7</i>       | <i>T/G</i>       | 0.37 | 118 (41.7)                      | 118 (41.7) | 47 (16.6) | 283 | 0.06 |
| rs174546  | <i>FADS1, FADS2, FADS3</i> | <i>C/T</i>       | 0.29 | 140 (52.2)                      | 101 (37.7) | 27 (10.1) | 268 | 0.17 |
| rs4846914 | <i>GALNT2</i>              | <i>A/G</i>       | 0.47 | 85 (31.3)                       | 120 (44.1) | 67 (24.6) | 272 | 0.06 |
| rs4149268 | <i>ABCA1</i>               | <i>C/T</i>       | 0.42 | 94 (33.5)                       | 140 (49.8) | 47 (16.7) | 281 | 0.67 |
| rs439401  | <i>APOE,APOC1,APOC2</i>    | <i>C/T</i>       | 0.37 | 109 (38.1)                      | 141 (49.3) | 36 (12.6) | 286 | 0.36 |

<sup>a</sup>Number of subjects for each genotype (% total)

MAF minor allele frequency; SNP single nucleotide polymorphism. 1 = major allele; 2 = minor allele.

\*Significance of deviation from Hardy-Weinberg equilibrium tested by  $\chi^2$  test with 1 *df* ( $P < 0.05$ ).
