# Supplementary material
Source: PubMed Central journal article supplement (PMC4169063)
Supplement: 12263_2014_412_MOESM3_ESM.pdf [file 12263_2014_412_MOESM3_ESM.pdf]

Article title: Genetic predisposition scores for dyslipidaemia influence plasma lipid concentrations at baseline, but not the changes after controlled intake of n-3 polyunsaturated fatty acids

Journal name: Genes and Nutrition

Author names: Aseel AlSaleh, Zoitsa Maniou, Fiona J Lewis, Wendy L Hall, Thomas A B Sanders and Sandra D O'Dell.

Affiliation and e-mail address of the corresponding author: Dr Sandra O'Dell, King's College London, School of Medicine, Diabetes and Nutritional Sciences Division.

E-mail: sandra.o'dell@kcl.ac.uk.

**Online Resource 3** Association between individual risk SNPs and plasma TC, LDL-C, HDL-C and TG concentration at baseline<sup>a</sup>

| Association of TC SNPs with TC at baseline |                          |        |       |            |                       |          |             |                   |                                                       |
|--------------------------------------------|--------------------------|--------|-------|------------|-----------------------|----------|-------------|-------------------|-------------------------------------------------------|
| SNP                                        | Gene                     | Effect | SE    | <i>P</i> * | <i>r</i> <sup>2</sup> | <i>n</i> | Risk allele | Risk allele freq. | Original SNP (LD <i>r</i> <sup>2</sup> ) <sup>b</sup> |
| rs3764261                                  | <i>CETP</i>              | 0.007  | 0.123 | 0.91       | 0.039                 | 270      | T           | 0.36              |                                                       |
| rs1532085                                  | <i>LIPC</i>              | -0.059 | 0.127 | 0.34       | 0.028                 | 279      | A           | 0.43              |                                                       |
| rs1367117                                  | <i>APOB</i>              | 0.002  | 0.123 | 0.97       | 0.028                 | 270      | A           | 0.30              |                                                       |
| rs4299376                                  | <i>ABCG5,ABCG8</i>       | 0.009  | 0.117 | 0.89       | 0.026                 | 278      | G           | 0.32              |                                                       |
| rs6882076                                  | <i>TIMD4,HAVCR1</i>      | -0.11  | 0.117 | 0.060      | 0.038                 | 288      | C           | 0.64              |                                                       |
| rs1260326                                  | <i>GCKR</i>              | -0.132 | 0.124 | 0.030      | 0.045                 | 282      | T           | 0.39              |                                                       |
| rs2954029                                  | <i>TRIB1</i>             | -0.075 | 0.134 | 0.21       | 0.051                 | 273      | A           | 0.53              |                                                       |
| rs2131925                                  | <i>ANGPTL3,DOCK7</i>     | -0.11  | 0.119 | 0.85       | 0.031                 | 284      | T           | 0.63              | rs3850634 (1.0), rs1167998 (1.0)                      |
| rs174546                                   | <i>FADS1,FADS2,FADS3</i> | 0.034  | 0.123 | 0.59       | 0.038                 | 268      | T           | 0.71              | rs174550 (1.0)                                        |

  

| Association of LDL-C SNPs with LDL-C at baseline |                          |        |       |            |                       |          |             |                   |                                                       |
|--------------------------------------------------|--------------------------|--------|-------|------------|-----------------------|----------|-------------|-------------------|-------------------------------------------------------|
| SNP                                              | Gene                     | Effect | SE    | <i>P</i> * | <i>r</i> <sup>2</sup> | <i>n</i> | Risk allele | Risk allele freq. | Original SNP (LD <i>r</i> <sup>2</sup> ) <sup>b</sup> |
| rs3764261                                        | <i>CETP</i>              | 0.004  | 0.099 | 0.95       | 0.032                 | 270      | G           | 0.63              | rs247616 (1.0)                                        |
| rs1367117                                        | <i>APOB</i>              | -0.037 | 0.099 | 0.71       | 0.030                 | 271      | A           | 0.30              |                                                       |
| rs4299376                                        | <i>ABCG5,ABCG8</i>       | -0.021 | 0.094 | 0.72       | 0.025                 | 287      | G           | 0.32              |                                                       |
| rs6882076                                        | <i>TIMD4,HAVCR1</i>      | -0.146 | 0.094 | 0.12       | 0.036                 | 288      | C           | 0.64              |                                                       |
| rs2954029                                        | <i>TRIB1</i>             | -0.046 | 0.108 | 0.45       | 0.030                 | 273      | A           | 0.53              | rs2954022 (0.94)                                      |
| rs2131925                                        | <i>ANGPTL3,DOCK7</i>     | -0.009 | 0.094 | 0.87       | 0.036                 | 284      | T           | 0.63              | rs3850634 (1.0)                                       |
| rs174546                                         | <i>FADS1,FADS2,FADS3</i> | 0.052  | 0.098 | 0.40       | 0.030                 | 268      | T           | 0.71              |                                                       |

Association of HDL-C SNPs with HDL-C at baseline

| SNP       | Gene                     | Effect | SE    | <i>P</i> * | <i>r</i> <sup>2</sup> | <i>n</i> | Risk allele | Risk allele freq. | Original SNP (LD <i>r</i> <sup>2</sup> ) <sup>b</sup> |
|-----------|--------------------------|--------|-------|------------|-----------------------|----------|-------------|-------------------|-------------------------------------------------------|
| rs3764261 | <i>CETP</i>              | 0.076  | 0.052 | 0.15       | 0.206                 | 270      | G           | 0.63              |                                                       |
| rs1532085 | <i>LIPC</i>              | -0.022 | 0.043 | 0.66       | 0.304                 | 303      | G           | 0.57              |                                                       |
| rs4846914 | <i>GALNT2</i>            | 0.023  | 0.043 | 0.47       | 0.299                 | 297      | G           | 0.47              |                                                       |
| rs4149268 | <i>ABCA1</i>             | -0.033 | 0.052 | 0.52       | 0.226                 | 281      | C           | 0.58              |                                                       |
| rs2954029 | <i>TRIB1</i>             | -0.099 | 0.046 | 0.05       | 0.301                 | 300      | A           | 0.53              | rs10808546 (1.0)                                      |
| rs174546  | <i>FADS1,FADS2,FADS3</i> | -0.082 | 0.042 | 0.11       | 0.287                 | 295      | T           | 0.29              | rs174547 (1.0)                                        |

Association of TG SNPs with lnTG at baseline<sup>c</sup>

| SNP       | Gene                     | Effect | SE    | <i>P</i> * | <i>r</i> <sup>2</sup> | <i>n</i> | Risk allele | Risk allele freq. | Original SNP (LD <i>r</i> <sup>2</sup> ) <sup>b</sup> |
|-----------|--------------------------|--------|-------|------------|-----------------------|----------|-------------|-------------------|-------------------------------------------------------|
| rs3764261 | <i>CETP</i>              | -0.081 | 0.054 | 0.16       | 0.157                 | 270      | G           | 0.63              | rs7205804 (1.0)                                       |
| rs4846914 | <i>GALNT2</i>            | -0.012 | 0.057 | 0.83       | 0.127                 | 270      | G           | 0.47              |                                                       |
| rs6882076 | <i>TIMD4,HAVCR1</i>      | -0.021 | 0.051 | 0.71       | 0.132                 | 288      | C           | 0.64              | rs1553318 (1.0)                                       |
| rs1260326 | <i>GCKR</i>              | 0.035  | 0.054 | 0.52       | 0.136                 | 282      | T           | 0.39              |                                                       |
| rs2954029 | <i>TRIB1</i>             | -0.002 | 0.059 | 0.97       | 0.15                  | 270      | A           | 0.53              |                                                       |
| rs2131925 | <i>ANGPTL3,DOCK7</i>     | 0.067  | 0.052 | 0.24       | 0.237                 | 284      | T           | 0.63              |                                                       |
| rs439401  | <i>APOE,APOC1,APOC2</i>  | -0.003 | 0.053 | 0.96       | 0.123                 | 287      | C           | 0.63              |                                                       |
| rs174546  | <i>FADS1,FADS2,FADS3</i> | -0.003 | 0.053 | 0.95       | 0.152                 | 268      | T           | 0.29              |                                                       |

<sup>a</sup>Data are the coefficients of associations of SNP with the trait at baseline presented as effect size and standard error derived from linear regression models of SNP against trait at baseline. The proportion of explained variance is indicated by *r*<sup>2</sup> and *n* is the number of participants in each subgroup.

<sup>b</sup>The original SNP identified in GWAS and the LD *r*<sup>2</sup> value to the proxy SNP used in this analysis.

<sup>c</sup>TG data was logged for analysis and is presented in that form.

*BMI* Body mass index; *GWAS* genome-wide association study; *HDL-C* high density lipoprotein cholesterol; *LD* linkage disequilibrium; *LDL-C* low density lipoprotein-cholesterol; *SE* standard error; *SNP* single nucleotide polymorphism; *TC* total cholesterol; *TG* triglyceride.

\*Significance derived from linear regression models. *P*-values for adjusted for BMI, age, gender and ethnicity.
